# Supplementary material
Source: PubMed Central journal article supplement (PMC10570916)
Supplement: jama-e2320850-s004.pdf [file jama-e2320850-s004.pdf]

## Data Sharing Statement

Jansen. Emergency Department Resuscitative Endovascular Balloon Occlusion of the Aorta in Trauma Patients With Exsanguinating Hemorrhage. *JAMA*. Published October 12, 2023.  
doi:10.1001/jama.2023.20850

### Data

**Data available:** Yes

**Data types:** Other (please specify)

**Additional Information:** Data will be made available for sharing on request.

**How to access data:** Requests for access should be addressed to the corresponding author and will be considered by the study team.

**When available:** With publication

### Supporting Documents

**Document types:** None

### Additional Information

**Who can access the data:** Researchers whose proposed use of the data has been approved.

**Types of analyses:** Requests will be considered on a case by case basis.

**Mechanisms of data availability:** After approval of a proposal
